# Supplementary material
Source: PubMed Central journal article supplement (PMC3746906)
Supplement: 1309800110_pnas.201309800SI.pdf [file 1309800110_pnas.201309800SI.pdf]

# Supporting Information

Donnianni and Symington 10.1073/pnas.1309800110

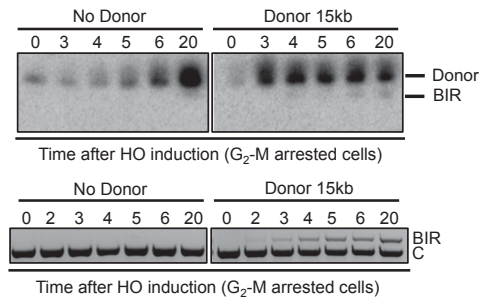

**Fig. S1.** Detection of the break-induced replication (BIR) translocation product in  $G_2$ -M arrested cells by pulsed-field gel electrophoresis (PFGE). Lower panel shows the BIR product detected by PCR for the same samples.

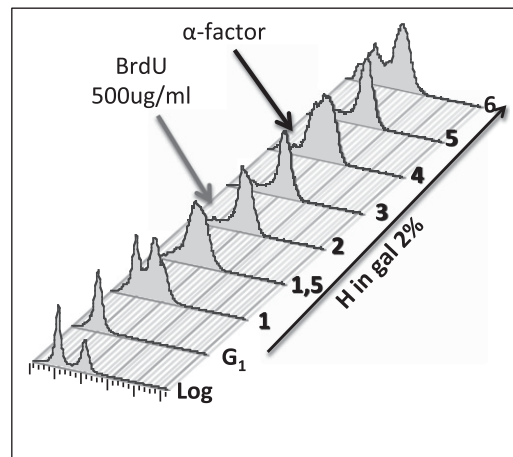

**Fig. S2.** Protocol for BrdU incorporation. Cells were arrested in  $G_1$  phase then released into medium containing 2% galactose to induce HO. BrdU was added 2 h later when bulk DNA synthesis was completed.
